# Supplementary material for: Fossil plant stomata indicate decreasing atmospheric CO 2 prior to the Eocene–Oligocene boundary
Source: Copernicus journal article supplement (doi:10.5194/cp-12-439-2016), 2016-02-25
Supplement: Supplementary file 1 [file Supplement1.xlsx]

## Sheet: Sheet1
Epoch/series	Site	Statigraphic Location	Sample ID	Lef Nr:	Source	SD (mm2)	StDev	pCo2 Mod	StDev	pCO2 Carb	StDev	pCO2 Ave	StDev
			PfLI 92/87	1	MMG Dresden	400		479.976		819.165		649.571
			PfLI 93/87	1	MMG Dresden	376.471		509.975		870.363		690.169
			PfLI 94/87	1	MMG Dresden	517.647		370.891		632.991		501.941
		underlying bed	PfLI 95/87	1	MMG Dresden	423.529		453.311		773.656		613.483
late middle	Profen-Süd	of lignite		1	MMG Dresden	352.941		543.973		928.387		736.18
Eocene		seam 1	PfLI 96/87	1	MMG Dresden	447.059		429.452		732.937		581.195
		SPP zone 17		1	MMG Dresden	282.353		679.966		1160.48		920.225
			PfLI 97/87	1	MMG Dresden	541.176		354.765		605.47		480.117
			PfLI 98/87	1	MMG Dresden	494.118		388.552		663.134		525.843
					Mean	426.144	83.5579	467.873	101.78	798.51	173.705	633.191	137.742
			Kn 103/82	1	MMG Dresden	564.706		339.983		580.242		460.112
					MMG Dresden	494.118		388.552		663.134		525.843
			Kn 104/82		MMG Dresden	635.294		302.207		515.771		408.989
					MMG Dresden	470.588		407.98		696.29		552.135
					MMG Dresden	447.059		429.452		732.937		581.195
					MMG Dresden	541.176		354.765		605.47		480.117
			Kn 105/82		MMG Dresden	494.118		388.552		663.134		525.843
					MMG Dresden	517.647		370.891		632.991		501.941
Late Eocene	Knau	fluvial deposit	Kn 106/82		MMG Dresden	635.294		302.207		515.771		408.989
		SPP zone 17-18			MMG Dresden	541.176		354.765		605.47		480.117
			Kn 124/82	2	MMG Dresden	447.059		429.452		732.937		581.195
			Kn 125/82		MMG Dresden	494.118		388.552		663.134		525.843
					MMG Dresden	470.588		407.98		696.29		552.135
			Kn 126/82		MMG Dresden	329.412		582.828		994.7		788.764
			Kn 127/82		MMG Dresden	376.471		509.975		870.363		690.169
			Kn 137/82	3	MMG Dresden	494.118		388.552		663.134		525.843
			Kn 138/82		MMG Dresden	470.588		407.98		696.29		552.135
					Mean	495.502	77.8031	397.334	68.7016	678.121	117.252	537.727	92.9765
			Schle OE 1/10	1	MMG Dresden	635.294		302.207		515.771		408.989
					MMG Dresden	588.235		326.384		557.032		441.708
					MMG Dresden	588.235		326.384		557.032		441.708
					MMG Dresden	705.882		271.986		464.193		368.09
					MMG Dresden	658.824		291.414		497.35		394.382
		underlying bed	Schle OE 2/10	2	MMG Dresden	752.941		254.987		435.181		345.084
Late Eocene	Schleenhain 1	of lignite			MMG Dresden	658.824		291.414		497.35		394.382
		seam 23u			MMG Dresden	729.412		263.213		449.22		356.216
		SPP zone 18u			MMG Dresden	729.412		263.213		449.22		356.216
					MMG Dresden	658.824		291.414		497.35		394.382
			Schle OE 3/10	3	MMG Dresden	776.471		247.26		421.994		334.627
					MMG Dresden	752.941		254.987		435.181		345.084
					MMG Dresden	752.941		254.987		435.181		345.084
					MMG Dresden	729.412		263.213		449.22		356.216
					MMG Dresden	776.471		247.26		421.994		334.627
			Schle OE 4/10	4	MMG Dresden	470.588		407.98		696.29		552.135
					MMG Dresden	611.765		313.831		535.608		424.719
					MMG Dresden	564.706		339.983		580.242		460.112
					MMG Dresden	517.647		370.891		632.991		501.941
					MMG Dresden	564.706		339.983		580.242		460.112
		intercalated bed	HbE 12/82	1	MMG Dresden	541.176		354.765		605.47		480.117
		between	HbE 16/82		MMG Dresden	447.059		429.452		732.937		581.195
Late Eocene	Haselbach 1	lignite seam	HbE 214/71	2	MMG Dresden	494.118		388.552		663.134		525.843
		23u and 23o	HbE 216/71		MMG Dresden	541.176		354.765		605.47		480.117
		SPP zone 18uo	HbE 217/71		MMG Dresden	564.706		339.983		580.242		460.112
					Mean	635.294	101.731	311.62	52.8356	531.836	90.1735	421.728	71.5046
			Schle OE 12/07	1	MMG Dresden	470.588		407.98		696.29		552.135
			Schle OE 22/07	2	MMG Dresden	705.882		271.986		464.193		368.09
					MMG Dresden	682.353		281.365		480.2		380.783
					MMG Dresden	752.941		254.987		435.181		345.084
		underlying bed			MMG Dresden	682.353		281.365		480.2		380.783
Late Eocene	Schleenhain 2	of lignite			MMG Dresden	658.824		291.414		497.35		394.382
		seam 23o	Schle OE 24/07	3	MMG Dresden	517.647		370.891		632.991		501.941
		SPP zone 18o			MMG Dresden	588.235		326.384		557.032		441.708
					MMG Dresden	564.706		339.983		580.242		460.112
					MMG Dresden	588.235		326.384		557.032		441.708
					MMG Dresden	541.176		354.765		605.47		480.117
			Schle OE 39/07	4	MMG Dresden	541.176		354.765		605.47		480.117
					MMG Dresden	564.706		339.983		580.242		460.112
					MMG Dresden	588.235		326.384		557.032		441.708
					MMG Dresden	517.647		370.891		632.991		501.941
					MMG Dresden	564.706		339.983		580.242		460.112
			Schle OE 4/08	5	MMG Dresden	682.353		281.365		480.2		380.783
					MMG Dresden	658.824		291.414		497.35		394.382
					MMG Dresden	823.529		233.131		397.88		315.506
					MMG Dresden	611.765		313.831		535.608		424.719
					MMG Dresden	682.353		281.365		480.2		380.783
			Schle OE 81/08	6	MMG Dresden	635.294		302.207		515.771		408.989
					MMG Dresden	729.412		263.213		449.22		356.216
					MMG Dresden	752.941		254.987		435.181		345.084
					MMG Dresden	658.824		291.414		497.35		394.382
					MMG Dresden	682.353		281.365		480.2		380.783
			Schle OE 85/08	7	MMG Dresden	588.235		326.384		557.032		441.708
					MMG Dresden	658.824		291.414		497.35		394.382
					MMG Dresden	611.765		313.831		535.608		424.719
					MMG Dresden	658.824		291.414		497.35		394.382
					MMG Dresden	635.294		302.207		515.771		408.989
			Schle OE 94/08	8	MMG Dresden	658.824		291.414		497.35		394.382
					MMG Dresden	682.353		281.365		480.2		380.783
					MMG Dresden	705.882		271.986		464.193		368.09
					MMG Dresden	635.294		302.207		515.771		408.989
					MMG Dresden	658.824		291.414		497.35		394.382
			Schle OE 95/08	9	MMG Dresden	658.824		291.414		497.35		394.382
					MMG Dresden	705.882		271.986		464.193		368.09
					MMG Dresden	800		239.988		409.582		324.785
					MMG Dresden	729.412		263.213		449.22		356.216
					MMG Dresden	705.882		271.986		464.193		368.09
			Schle OE 118/08	10	MMG Dresden	611.765		313.831		535.608		424.719
					MMG Dresden	705.882		271.986		464.193		368.09
					MMG Dresden	658.824		291.414		497.35		394.382
					MMG Dresden	635.294		302.207		515.771		408.989
					MMG Dresden	658.824		291.414		497.35		394.382
			Schle OE 156/08	11	MMG Dresden	588.235		326.384		557.032		441.708
					MMG Dresden	470.588		407.98		696.29		552.135
					MMG Dresden	517.647		370.891		632.991		501.941
					MMG Dresden	611.765		313.831		535.608		424.719
					MMG Dresden	564.706		339.983		580.242		460.112
			Schle OE 184/08	12	MMG Dresden	541.176		354.765		605.47		480.117
					MMG Dresden	564.706		339.983		580.242		460.112
			Schle OE 186/08	13	MMG Dresden	517.647		370.891		632.991		501.941
					MMG Dresden	541.176		354.765		605.47		480.117
			Schle OE 187/08	14	MMG Dresden	564.706		339.983		580.242		460.112
					MMG Dresden	564.706		339.983		580.242		460.112
			Schle OE 188/08	15	MMG Dresden	517.647		370.891		632.991		501.941
					MMG Dresden	635.294		302.207		515.771		408.989
					MMG Dresden	564.706		339.983		580.242		460.112
					MMG Dresden	635.294		302.207		515.771		408.989
			Schle OE 4/00	16	MMG Dresden	658.824		291.414		497.35		394.382
					MMG Dresden	752.941		254.987		435.181		345.084
					MMG Dresden	894.118		214.726		366.469		290.597
		leaf measure			MMG Dresden	729.412		263.213		449.22		356.216
Late Eocene	Schleenhain 2	in lignite			MMG Dresden	870.588		220.53		376.373		298.451
		seam 23o	Schle OE 6/00	17	MMG Dresden	752.941		254.987		435.181		345.084
		SPP zone 18o			MMG Dresden	800		239.988		409.582		324.785
					MMG Dresden	894.118		214.726		366.469		290.597
					MMG Dresden	988.235		194.276		331.567		262.921
					MMG Dresden	988.235		194.276		331.567		262.921
			Schle OE 7/00	18	MMG Dresden	1176.47		163.192		278.516		220.854
					MMG Dresden	1176.47		163.192		278.516		220.854
					MMG Dresden	1011.76		189.758		323.856		256.807
					MMG Dresden	1035.29		185.445		316.496		250.97
					MMG Dresden	964.706		199.014		339.654		269.334
			Schle OE 10/00	19	MMG Dresden	800		239.988		409.582		324.785
					MMG Dresden	870.588		220.53		376.373		298.451
					MMG Dresden	800		239.988		409.582		324.785
					MMG Dresden	800		239.988		409.582		324.785
					MMG Dresden	823.529		233.131		397.88		315.506
			Schle OE 11/00	20	MMG Dresden	894.118		214.726		366.469		290.597
					MMG Dresden	800		239.988		409.582		324.785
					MMG Dresden	847.059		226.655		386.828		306.742
					MMG Dresden	823.529		233.131		397.88		315.506
					MMG Dresden	870.588		220.53		376.373		298.451
			Schle OE 17/00	21	MMG Dresden	752.941		254.987		435.181		345.084
					MMG Dresden	729.412		263.213		449.22		356.216
					MMG Dresden	870.588		220.53		376.373		298.451
					MMG Dresden	752.941		254.987		435.181		345.084
					MMG Dresden	964.706		199.014		339.654		269.334
			Schle OE 18/00	22	MMG Dresden	800		239.988		409.582		324.785
					MMG Dresden	823.529		233.131		397.88		315.506
					MMG Dresden	705.882		271.986		464.193		368.09
					MMG Dresden	776.471		247.26		421.994		334.627
					MMG Dresden	870.588		220.53		376.373		298.451
			Schle OE 20/00	23	MMG Dresden	823.529		233.131		397.88		315.506
					MMG Dresden	870.588		220.53		376.373		298.451
					MMG Dresden	729.412		263.213		449.22		356.216
					MMG Dresden	705.882		271.986		464.193		368.09
					MMG Dresden	776.471		247.26		421.994		334.627
			Schle OE 22/00	24	MMG Dresden	635.294		302.207		515.771		408.989
					MMG Dresden	705.882		271.986		464.193		368.09
					MMG Dresden	635.294		302.207		515.771		408.989
					MMG Dresden	611.765		313.831		535.608		424.719
					MMG Dresden	729.412		263.213		449.22		356.216
			Schle OE 26/00	25	MMG Dresden	564.706		339.983		580.242		460.112
					MMG Dresden	588.235		326.384		557.032		441.708
					MMG Dresden	611.765		313.831		535.608		424.719
					MMG Dresden	564.706		339.983		580.242		460.112
					MMG Dresden	564.706		339.983		580.242		460.112
			Schle OE 30/00	26	MMG Dresden	541.176		354.765		605.47		480.117
			Schle OE 31/00		MMG Dresden	588.235		326.384		557.032		441.708
			Schle OE 34/00	27	MMG Dresden	658.824		291.414		497.35		394.382
					MMG Dresden	988.235		194.276		331.567		262.921
					MMG Dresden	847.059		226.655		386.828		306.742
					MMG Dresden	917.647		209.22		357.072		283.146
					MMG Dresden	800		239.988		409.582		324.785
			Schle OE 37/00	28	MMG Dresden	705.882		271.986		464.193		368.09
					MMG Dresden	611.765		313.831		535.608		424.719
					MMG Dresden	588.235		326.384		557.032		441.708
					MMG Dresden	635.294		302.207		515.771		408.989
					MMG Dresden	658.824		291.414		497.35		394.382
			Schle OE 38/00	29	MMG Dresden	1082.35		177.382		302.735		240.059
					MMG Dresden	917.647		209.22		357.072		283.146
					MMG Dresden	941.176		203.99		348.145		276.067
					MMG Dresden	1035.29		185.445		316.496		250.97
					MMG Dresden	1011.76		189.758		323.856		256.807
			Schle OE 40/00	30	MMG Dresden	705.882		271.986		464.193		368.09
					MMG Dresden	800		239.988		409.582		324.785
					MMG Dresden	776.471		247.26		421.994		334.627
					MMG Dresden	635.294		302.207		515.771		408.989
					MMG Dresden	611.765		313.831		535.608		424.719
			Schle OE 41/00	31	MMG Dresden	1035.29		185.445		316.496		250.97
					MMG Dresden	823.529		233.131		397.88		315.506
					MMG Dresden	847.059		226.655		386.828		306.742
					MMG Dresden	917.647		209.22		357.072		283.146
					MMG Dresden	847.059		226.655		386.828		306.742
			Schle OE 42/00	32	MMG Dresden	658.824		291.414		497.35		394.382
					MMG Dresden	705.882		271.986		464.193		368.09
					MMG Dresden	658.824		291.414		497.35		394.382
					MMG Dresden	705.882		271.986		464.193		368.09
					MMG Dresden	705.882		271.986		464.193		368.09
			Schle OE 43/00		MMG Dresden	941.176		203.99		348.145		276.067
					MMG Dresden	776.471		247.26		421.994		334.627
					MMG Dresden	847.059		226.655		386.828		306.742
					MMG Dresden	847.059		226.655		386.828		306.742
					MMG Dresden	682.353		281.365		480.2		380.783
			Schle OE 45/00	33	MMG Dresden	941.176		203.99		348.145		276.067
					MMG Dresden	705.882		271.986		464.193		368.09
					MMG Dresden	847.059		226.655		386.828		306.742
					MMG Dresden	917.647		209.22		357.072		283.146
					MMG Dresden	752.941		254.987		435.181		345.084
			Schle OE 46/00	35	MMG Dresden	705.882		271.986		464.193		368.09
					MMG Dresden	800		239.988		409.582		324.785
					MMG Dresden	988.235		194.276		331.567		262.921
					MMG Dresden	894.118		214.726		366.469		290.597
					MMG Dresden	870.588		220.53		376.373		298.451
			Schle OE 49/00	36	MMG Dresden	823.529		233.131		397.88		315.506
					MMG Dresden	941.176		203.99		348.145		276.067
					MMG Dresden	870.588		220.53		376.373		298.451
					MMG Dresden	847.059		226.655		386.828		306.742
					MMG Dresden	894.118		214.726		366.469		290.597
			Schle OE 51/00	37	MMG Dresden	752.941		254.987		435.181		345.084
					MMG Dresden	988.235		194.276		331.567		262.921
					MMG Dresden	1058.82		181.324		309.462		245.393
					MMG Dresden	894.118		214.726		366.469		290.597
					MMG Dresden	823.529		233.131		397.88		315.506
			Schle OE 53/00	38	MMG Dresden	800		239.988		409.582		324.785
					MMG Dresden	1011.76		189.758		323.856		256.807
					MMG Dresden	823.529		233.131		397.88		315.506
					MMG Dresden	752.941		254.987		435.181		345.084
					MMG Dresden	847.059		226.655		386.828		306.742
			Schle OE 58/00	39	MMG Dresden	541.176		354.765		605.47		480.117
					MMG Dresden	517.647		370.891		632.991		501.941
					MMG Dresden	611.765		313.831		535.608		424.719
					MMG Dresden	588.235		326.384		557.032		441.708
					MMG Dresden	564.706		339.983		580.242		460.112
					Mean	740.648	148.901	269.556	53.0123	460.045	90.475	364.801	71.7437
			Schle MO 142/94	1	MMG Dresden	564.706		339.983		580.242		460.112
			Schle MO 143/94	2	MMG Dresden	611.765		313.831		535.608		424.719
					MMG Dresden	658.824		291.414		497.35		394.382
					MMG Dresden	635.294		302.207		515.771		408.989
		overlying bed			MMG Dresden	705.882		271.986		464.193		368.09
Latest	Schleenhain 3	of lignite			MMG Dresden	611.765		313.831		535.608		424.719
Eocene		seam 23o	Schle MO 160/94	3	MMG Dresden	776.471		247.26		421.994		334.627
		SPP zone 19 (?)			MMG Dresden	658.824		291.414		497.35		394.382
					MMG Dresden	635.294		302.207		515.771		408.989
					MMG Dresden	588.235		326.384		557.032		441.708
					MMG Dresden	682.353		281.365		480.2		380.783
			Schle MO 170/94	4	MMG Dresden	776.471		247.26		421.994		334.627
			Schle MO 181/94	5	MMG Dresden	917.647		209.22		357.072		283.146
			Schle MO 184/94	6	MMG Dresden	588.235		326.384		557.032		441.708
					MMG Dresden	635.294		302.207		515.771		408.989
			Schle MO 191/94	7	MMG Dresden	635.294		302.207		515.771		408.989
			Schle MO 191°/94	8	MMG Dresden	729.412		263.213		449.22		356.216
					MMG Dresden	611.765		313.831		535.608		424.719
				9	MMG Dresden	635.294		302.207		515.771		408.989
			Schle MO 194/94		MMG Dresden	541.176		354.765		605.47		480.117
					MMG Dresden	611.765		313.831		535.608		424.719
					MMG Dresden	588.235		326.384		557.032		441.708
					MMG Dresden	611.765		313.831		535.608		424.719
					MMG Dresden	564.706		339.983		580.242		460.112
			Schle MO 201/94	10	MMG Dresden	729.412		263.213		449.22		356.216
					MMG Dresden	752.941		254.987		435.181		345.084
			Schle MO 206/94	11	MMG Dresden	517.647		370.891		632.991		501.941
					MMG Dresden	588.235		326.384		557.032		441.708
					MMG Dresden	611.765		313.831		535.608		424.719
					MMG Dresden	611.765		313.831		535.608		424.719
					MMG Dresden	541.176		354.765		605.47		480.117
					Mean	642.884	84.0469	303.068	35.5402	517.24	60.6557	410.154	48.098
			Schle 35 /77	1	MMG Dresden	588.235		326.384		557.032		441.708
			Schle T 19/77	2	MMG Dresden	752.941		254.987		435.181		345.084
					MMG Dresden	847.059		226.655		386.828		306.742
					MMG Dresden	823.529		233.131		397.88		315.506
					MMG Dresden	800		239.988		409.582		324.785
					MMG Dresden	823.529		233.131		397.88		315.506
Earliest	Schleenhain 4	Haselbach horizon	Schle T 26/77	3	MMG Dresden	870.588		220.53		376.373		298.451
Oligocene		SPP zone 20A/B	Schle T 27/77		MMG Dresden	752.941		254.987		435.181		345.084
					MMG Dresden	800		239.988		409.582		324.785
					MMG Dresden	776.471		247.26		421.994		334.627
					MMG Dresden	635.294		302.207		515.771		408.989
					MMG Dresden	752.941		254.987		435.181		345.084
			Schle MO 86/94	4	MMG Dresden	800		239.988		409.582		324.785
					MMG Dresden	611.765		313.831		535.608		424.719
					MMG Dresden	752.941		254.987		435.181		345.084
					MMG Dresden	705.882		271.986		464.193		368.09
					MMG Dresden	682.353		281.365		480.2		380.783
			Schle MO 1/98	5	MMG Dresden	729.412		263.213		449.22		356.216
					MMG Dresden	588.235		326.384		557.032		441.708
					MMG Dresden	635.294		302.207		515.771		408.989
					MMG Dresden	658.824		291.414		497.35		394.382
					MMG Dresden	682.353		281.365		480.2		380.783
			Schle MO 3/98	6	MMG Dresden	823.529		233.131		397.88		315.506
					MMG Dresden	917.647		209.22		357.072		283.146
					MMG Dresden	800		239.988		409.582		324.785
					MMG Dresden	729.412		263.213		449.22		356.216
					MMG Dresden	776.471		247.26		421.994		334.627
			Schle MO 6/98	7	MMG Dresden	823.529		233.131		397.88		315.506
					MMG Dresden	847.059		226.655		386.828		306.742
					MMG Dresden	870.588		220.53		376.373		298.451
					MMG Dresden	635.294		302.207		515.771		408.989
					MMG Dresden	823.529		233.131		397.88		315.506
			Schle MO 8/05	8	MMG Dresden	800		239.988		409.582		324.785
					MMG Dresden	729.412		263.213		449.22		356.216
			Schle MO 9/05		MMG Dresden	705.882		271.986		464.193		368.09
					MMG Dresden	752.941		254.987		435.181		345.084
			Schle MO 10/05		MMG Dresden	635.294		302.207		515.771		408.989
			HbO 101/77	9	MMG Dresden	611.765		313.831		535.608		424.719
			HbO 102/77		MMG Dresden	823.529		233.131		397.88		315.506
			HbO 104/77		MMG Dresden	752.941		254.987		435.181		345.084
			HbO 105/77		MMG Dresden	564.706		339.983		580.242		460.112
			HbO 106/77		MMG Dresden	541.176		354.765		605.47		480.117
Earliest	Haselbach 2	Haselbach horizon	HbO 109/77	10	MMG Dresden	847.059		226.655		386.828		306.742
Oligocene		SPP zone 20A/B			MMG Dresden	705.882		271.986		464.193		368.09
					MMG Dresden	729.412		263.213		449.22		356.216
			HbO 110/77		MMG Dresden	658.824		291.414		497.35		394.382
					MMG Dresden	682.353		281.365		480.2		380.783
			HbO 111/77	11	MMG Dresden	564.706		339.983		580.242		460.112
					MMG Dresden	611.765		313.831		535.608		424.719
					MMG Dresden	588.235		326.384		557.032		441.708
			HbO 112/77		MMG Dresden	541.176		354.765		605.47		480.117
					MMG Dresden	588.235		326.384		557.032		441.708
			HbO 113/77	12	MMG Dresden	423.529		453.311		773.656		613.483
					MMG Dresden	541.176		354.765		605.47		480.117
					MMG Dresden	423.529		453.311		773.656		613.483
			HbO 114/77		MMG Dresden	447.059		429.452		732.937		581.195
					MMG Dresden	541.176		354.765		605.47		480.117
			HbO 115/77	13	MMG Dresden	541.176		354.765		605.47		480.117
			HbO 117/77		MMG Dresden	611.765		313.831		535.608		424.719
					MMG Dresden	541.176		354.765		605.47		480.117
					MMG Dresden	588.235		326.384		557.032		441.708
					MMG Dresden	517.647		370.891		632.991		501.941
			HbO 186/77	14	MMG Dresden	776.471		247.26		421.994		334.627
					MMG Dresden	752.941		254.987		435.181		345.084
			HbO 187/77	15	MMG Dresden	470.588		407.98		696.29		552.135
					MMG Dresden	517.647		370.891		632.991		501.941
					MMG Dresden	682.353		281.365		480.2		380.783
			HbO 188/77		MMG Dresden	494.118		388.552		663.134		525.843
					MMG Dresden	658.824		291.414		497.35		394.382
			HbO 213/77	16	MMG Dresden	588.235		326.384		557.032		441.708
					MMG Dresden	635.294		302.207		515.771		408.989
					MMG Dresden	517.647		370.891		632.991		501.941
					MMG Dresden	564.706		339.983		580.242		460.112
					MMG Dresden	611.765		313.831		535.608		424.719
			HbO 214/77	17	MMG Dresden	682.353		281.365		480.2		380.783
					MMG Dresden	611.765		313.831		535.608		424.719
					MMG Dresden	635.294		302.207		515.771		408.989
					MMG Dresden	682.353		281.365		480.2		380.783
					MMG Dresden	658.824		291.414		497.35		394.382
			HbO 215/77	18	MMG Dresden	635.294		302.207		515.771		408.989
					MMG Dresden	729.412		263.213		449.22		356.216
					MMG Dresden	635.294		302.207		515.771		408.989
					MMG Dresden	588.235		326.384		557.032		441.708
					MMG Dresden	611.765		313.831		535.608		424.719
			HbO 216/77	19	MMG Dresden	705.882		271.986		464.193		368.09
					MMG Dresden	658.824		291.414		497.35		394.382
					MMG Dresden	611.765		313.831		535.608		424.719
					MMG Dresden	588.235		326.384		557.032		441.708
					MMG Dresden	635.294		302.207		515.771		408.989
			HbO 226/77	20	MMG Dresden	705.882		271.986		464.193		368.09
					MMG Dresden	494.118		388.552		663.134		525.843
					MMG Dresden	470.588		407.98		696.29		552.135
			HbO 233/77	21	MMG Dresden	376.471		509.975		870.363		690.169
			HbO 234/77		MMG Dresden	470.588		407.98		696.29		552.135
					MMG Dresden	494.118		388.552		663.134		525.843
					MMG Dresden	494.118		388.552		663.134		525.843
			HbO 235/77		MMG Dresden	564.706		339.983		580.242		460.112
					Mean	657.126	118.975	302.514	59.3113	516.295	101.225	409.405	80.2684
			KS 143/72	1	MMG Dresden	776.471		247.26		421.994		334.627
			KS 328/72		MMG Dresden	682.353		281.365		480.2		380.783
					MMG Dresden	658.824		291.414		497.35		394.382
					MMG Dresden	705.882		271.986		464.193		368.09
			KS 19/92	2	MMG Dresden	470.588		407.98		696.29		552.135
Late Oligocene	Kleinsaubermitz	"volcanic flora"			MMG Dresden	447.059		429.452		732.937		581.195
		SPP zone 20G			MMG Dresden	635.294		302.207		515.771		408.989
			KS 20/92		MMG Dresden	352.941		543.973		928.387		736.18
					MMG Dresden	400		479.976		819.165		649.571
			KS 63	3	MMG Dresden	611.765		313.831		535.608		424.719
					MMG Dresden	517.647		370.891		632.991		501.941
			KS 64		MMG Dresden	705.882		271.986		464.193		368.09
			KS 65		MMG Dresden	705.882		271.986		464.193		368.09
			KS 66		MMG Dresden	541.176		354.765		605.47		480.117
			KS 258/72	4	MMG Dresden	611.765		313.831		535.608		424.719
					MMG Dresden	588.235		326.384		557.032		441.708
			KS 260/72		MMG Dresden	682.353		281.365		480.2		380.783
			KS 261/72		MMG Dresden	705.882		271.986		464.193		368.09
			KS 262/72		MMG Dresden	705.882		271.986		464.193		368.09
			KS 299/72	5	MMG Dresden	635.294		302.207		515.771		408.989
					MMG Dresden	564.706		339.983		580.242		460.112
			KS 300/72		MMG Dresden	635.294		302.207		515.771		408.989
			KS 304/72		MMG Dresden	776.471		247.26		421.994		334.627
					MMG Dresden	635.294		302.207		515.771		408.989
			KS 306/72	6	MMG Dresden	658.824		291.414		497.35		394.382
					MMG Dresden	588.235		326.384		557.032		441.708
			KS 307/72		MMG Dresden	682.353		281.365		480.2		380.783
			KS 308/72		MMG Dresden	635.294		302.207		515.771		408.989
			KS 309/72		MMG Dresden	611.765		313.831		535.608		424.719
			KS 312/72	7	MMG Dresden	682.353		281.365		480.2		380.783
					MMG Dresden	588.235		326.384		557.032		441.708
					MMG Dresden	541.176		354.765		605.47		480.117
			KS 318/72	8	MMG Dresden	729.412		263.213		449.22		356.216
			KS 319/72		MMG Dresden	541.176		354.765		605.47		480.117
			KS 321/72		MMG Dresden	705.882		271.986		464.193		368.09
			KS 322/72a	9	MMG Dresden	635.294		302.207		515.771		408.989
					MMG Dresden	611.765		313.831		535.608		424.719
			KS 322/72b		MMG Dresden	658.824		291.414		497.35		394.382
					MMG Dresden	517.647		370.891		632.991		501.941
					MMG Dresden	611.765		313.831		535.608		424.719
			KS 329/72	10	MMG Dresden	611.765		313.831		535.608		424.719
			KS 330/72		MMG Dresden	564.706		339.983		580.242		460.112
			KS 331/72		MMG Dresden	611.765		313.831		535.608		424.719
			KS 332/72		MMG Dresden	705.882		271.986		464.193		368.09
			KS 333/72		MMG Dresden	682.353		281.365		480.2		380.783
			KS 334/72		MMG Dresden	564.706		339.983		580.242		460.112
			KS 40/73	11	MMG Dresden	541.176		354.765		605.47		480.117
			KS 41/73		MMG Dresden	447.059		429.452		732.937		581.195
			KS 42/73		MMG Dresden	588.235		326.384		557.032		441.708
			KS 43/73		MMG Dresden	494.118		388.552		663.134		525.843
					MMG Dresden	564.706		339.983		580.242		460.112
			KS 48/73	12	MMG Dresden	541.176		354.765		605.47		480.117
			KS 49/73		MMG Dresden	611.765		313.831		535.608		424.719
					MMG Dresden	682.353		281.365		480.2		380.783
			KS 50/73		MMG Dresden	682.353		281.365		480.2		380.783
			KS 51/73		MMG Dresden	611.765		313.831		535.608		424.719
			KS 194/73	13	MMG Dresden	564.706		339.983		580.242		460.112
			KS 195/73		MMG Dresden	517.647		370.891		632.991		501.941
			KS 196/73		MMG Dresden	611.765		313.831		535.608		424.719
			KS 197/73		MMG Dresden	776.471		247.26		421.994		334.627
			KS 201/73		MMG Dresden	752.941		254.987		435.181		345.084
			KS 202/73		MMG Dresden	517.647		370.891		632.991		501.941
			KS 203/73		MMG Dresden	423.529		453.311		773.656		613.483
			KS 214/73	14	MMG Dresden	517.647		370.891		632.991		501.941
			KS 216/73		MMG Dresden	541.176		354.765		605.47		480.117
			KS 219/73		MMG Dresden	517.647		370.891		632.991		501.941
					MMG Dresden	470.588		407.98		696.29		552.135
			KS 225/73	15	MMG Dresden	752.941		254.987		435.181		345.084
					MMG Dresden	729.412		263.213		449.22		356.216
			KS 227/73		MMG Dresden	752.941		254.987		435.181		345.084
					MMG Dresden	658.824		291.414		497.35		394.382
			KS 228/73		MMG Dresden	682.353		281.365		480.2		380.783
			LA/KS 1/94	16	MMG Dresden	564.706		339.983		580.242		460.112
			LA/KS 2/94		MMG Dresden	352.941		543.973		928.387		736.18
			LA/KS 186/93	17	MMG Dresden	705.882		271.986		464.193		368.09
					MMG Dresden	658.824		291.414		497.35		394.382
					MMG Dresden	729.412		263.213		449.22		356.216
			LA/KS 188/93		MMG Dresden	588.235		326.384		557.032		441.708
			LA/KS 128/93	18	MMG Dresden	729.412		263.213		449.22		356.216
					MMG Dresden	658.824		291.414		497.35		394.382
					MMG Dresden	658.824		291.414		497.35		394.382
			LA/KS 129/93		MMG Dresden	635.294		302.207		515.771		408.989
					MMG Dresden	705.882		271.986		464.193		368.09
			LA/KS 133/93	19	MMG Dresden	541.176		354.765		605.47		480.117
					MMG Dresden	682.353		281.365		480.2		380.783
					MMG Dresden	705.882		271.986		464.193		368.09
			LA/KS 134/93		MMG Dresden	635.294		302.207		515.771		408.989
			LA/KS 135/93		MMG Dresden	588.235		326.384		557.032		441.708
			LA/KS 102/93	20	MMG Dresden	564.706		339.983		580.242		460.112
					MMG Dresden	517.647		370.891		632.991		501.941
					MMG Dresden	658.824		291.414		497.35		394.382
			LA/KS 103/93		MMG Dresden	729.412		263.213		449.22		356.216
					MMG Dresden	705.882		271.986		464.193		368.09
			KS 87/92	21	MMG Dresden	588.235		326.384		557.032		441.708
			KS 88/92		MMG Dresden	517.647		370.891		632.991		501.941
			KS 139/72	22	MMG Dresden	729.412		263.213		449.22		356.216
			KS 140/72	23	MMG Dresden	729.412		263.213		449.22		356.216
					MMG Dresden	752.941		254.987		435.181		345.084
			KS 141/72	24	MMG Dresden	847.059		226.655		386.828		306.742
			KS 142/72	25	MMG Dresden	800		239.988		409.582		324.785
					Mean	623.294	97.8176	316.82	58.4126	540.709	99.6915	428.765	79.052
			WzII 198/88	1	MMG Dresden	470.588		407.98		696.29		552.135
					MMG Dresden	447.059		429.452		732.937		581.195
					MMG Dresden	517.647		370.891		632.991		501.941
					MMG Dresden	564.706		339.983		580.242		460.112
					MMG Dresden	517.647		370.891		632.991		501.941
latest	Witznitz	Witznitz horizon	WzII 199/88	2	MMG Dresden	776.471		247.26		421.994		334.627
Oligocene		SPN zone II			MMG Dresden	729.412		263.213		449.22		356.216
					MMG Dresden	776.471		247.26		421.994		334.627
					MMG Dresden	682.353		281.365		480.2		380.783
					MMG Dresden	705.882		271.986		464.193		368.09
			WzII 200/88	3	MMG Dresden	611.765		313.831		535.608		424.719
					MMG Dresden	635.294		302.207		515.771		408.989
					MMG Dresden	588.235		326.384		557.032		441.708
					MMG Dresden	611.765		313.831		535.608		424.719
					MMG Dresden	658.824		291.414		497.35		394.382
			WzII 201/88	4	MMG Dresden	611.765		313.831		535.608		424.719
			WzII 203/88		MMG Dresden	447.059		429.452		732.937		581.195
					MMG Dresden	423.529		453.311		773.656		613.483
					MMG Dresden	400		479.976		819.165		649.571
			WzII 216/88	5	MMG Dresden	635.294		302.207		515.771		408.989
					MMG Dresden	658.824		291.414		497.35		394.382
					MMG Dresden	635.294		302.207		515.771		408.989
					MMG Dresden	658.824		291.414		497.35		394.382
					MMG Dresden	682.353		281.365		480.2		380.783
			WzII 225/88	6	MMG Dresden	517.647		370.891		632.991		501.941
					MMG Dresden	611.765		313.831		535.608		424.719
					MMG Dresden	635.294		302.207		515.771		408.989
					MMG Dresden	682.353		281.365		480.2		380.783
					MMG Dresden	588.235		326.384		557.032		441.708
			Wz 15/92	7	MMG Dresden	494.118		388.552		663.134		525.843
					MMG Dresden	494.118		388.552		663.134		525.843
					MMG Dresden	541.176		354.765		605.47		480.117
					MMG Dresden	517.647		370.891		632.991		501.941
					MMG Dresden	470.588		407.98		696.29		552.135
			Wz 21/92	8	MMG Dresden	352.941		543.973		928.387		736.18
					MMG Dresden	400		479.976		819.165		649.571
					MMG Dresden	376.471		509.975		870.363		690.169
					MMG Dresden	423.529		453.311		773.656		613.483
					MMG Dresden	352.941		543.973		928.387		736.18
			Wz 26/92	9	MMG Dresden	423.529		453.311		773.656		613.483
					MMG Dresden	352.941		543.973		928.387		736.18
			Wz 29/92	10	MMG Dresden	611.765		313.831		535.608		424.719
					MMG Dresden	541.176		354.765		605.47		480.117
					MMG Dresden	588.235		326.384		557.032		441.708
					MMG Dresden	588.235		326.384		557.032		441.708
					MMG Dresden	611.765		313.831		535.608		424.719
			WzII 2/10	11	MMG Dresden	682.353		281.365		480.2		380.783
					MMG Dresden	705.882		271.986		464.193		368.09
					MMG Dresden	658.824		291.414		497.35		394.382
					MMG Dresden	682.353		281.365		480.2		380.783
					MMG Dresden	635.294		302.207		515.771		408.989
			WzII 3/10	12	MMG Dresden	635.294		302.207		515.771		408.989
					MMG Dresden	705.882		271.986		464.193		368.09
					MMG Dresden	729.412		263.213		449.22		356.216
					MMG Dresden	611.765		313.831		535.608		424.719
					MMG Dresden	658.824		291.414		497.35		394.382
			WzII 4/10	13	MMG Dresden	635.294		302.207		515.771		408.989
					MMG Dresden	588.235		326.384		557.032		441.708
					MMG Dresden	635.294		302.207		515.771		408.989
					MMG Dresden	517.647		370.891		632.991		501.941
					MMG Dresden	658.824		291.414		497.35		394.382
			WzII 5/10	14	MMG Dresden	494.118		388.552		663.134		525.843
					MMG Dresden	470.588		407.98		696.29		552.135
					MMG Dresden	423.529		453.311		773.656		613.483
					MMG Dresden	494.118		388.552		663.134		525.843
					MMG Dresden	470.588		407.98		696.29		552.135
			Wz 9/83	15	MMG Dresden	517.647		370.891		632.991		501.941
					MMG Dresden	541.176		354.765		605.47		480.117
					MMG Dresden	564.706		339.983		580.242		460.112
					MMG Dresden	541.176		354.765		605.47		480.117
			Wz 11b/83	16	MMG Dresden	352.941		543.973		928.387		736.18
					MMG Dresden	494.118		388.552		663.134		525.843
					MMG Dresden	470.588		407.98		696.29		552.135
					MMG Dresden	517.647		370.891		632.991		501.941
					MMG Dresden	470.588		407.98		696.29		552.135
			Wz 16/83	17	MMG Dresden	588.235		326.384		557.032		441.708
					MMG Dresden	635.294		302.207		515.771		408.989
					MMG Dresden	611.765		313.831		535.608		424.719
					MMG Dresden	517.647		370.891		632.991		501.941
			Wz 17/83		MMG Dresden	635.294		302.207		515.771		408.989
			Wz 25/83	18	MMG Dresden	729.412		263.213		449.22		356.216
					MMG Dresden	635.294		302.207		515.771		408.989
					MMG Dresden	611.765		313.831		535.608		424.719
					MMG Dresden	658.824		291.414		497.35		394.382
			Wz 25b/83		MMG Dresden	564.706		339.983		580.242		460.112
			Wz 27/83	19	MMG Dresden	352.941		543.973		928.387		736.18
					MMG Dresden	305.882		627.661		1071.22		849.438
					MMG Dresden	282.353		679.966		1160.48		920.225
					MMG Dresden	258.824		741.781		1265.98		1003.88
			Wz 32/83	20	MMG Dresden	635.294		302.207		515.771		408.989
					MMG Dresden	588.235		326.384		557.032		441.708
					MMG Dresden	564.706		339.983		580.242		460.112
					MMG Dresden	611.765		313.831		535.608		424.719
					MMG Dresden	564.706		339.983		580.242		460.112
			Wz 39/83	21	MMG Dresden	517.647		370.891		632.991		501.941
					MMG Dresden	611.765		313.831		535.608		424.719
					MMG Dresden	588.235		326.384		557.032		441.708
					MMG Dresden	588.235		326.384		557.032		441.708
			Wz 40/83		MMG Dresden	776.471		247.26		421.994		334.627
			Wz 3/84	22	MMG Dresden	541.176		354.765		605.47		480.117
					MMG Dresden	588.235		326.384		557.032		441.708
					MMG Dresden	541.176		354.765		605.47		480.117
					MMG Dresden	588.235		326.384		557.032		441.708
			Wz 4/84		MMG Dresden	447.059		429.452		732.937		581.195
			Wz 5/84	23	MMG Dresden	705.882		271.986		464.193		368.09
					MMG Dresden	588.235		326.384		557.032		441.708
					MMG Dresden	564.706		339.983		580.242		460.112
			Wz 6/84		MMG Dresden	494.118		388.552		663.134		525.843
			Wz 7/84		MMG Dresden	564.706		339.983		580.242		460.112
			Wz 21/85	25	MMG Dresden	705.882		271.986		464.193		368.09
					MMG Dresden	635.294		302.207		515.771		408.989
					MMG Dresden	682.353		281.365		480.2		380.783
					MMG Dresden	635.294		302.207		515.771		408.989
					MMG Dresden	705.882		271.986		464.193		368.09
			Wz 18/87	26	MMG Dresden	470.588		407.98		696.29		552.135
					MMG Dresden	517.647		370.891		632.991		501.941
					MMG Dresden	541.176		354.765		605.47		480.117
					MMG Dresden	494.118		388.552		663.134		525.843
			Wz 19/87		MMG Dresden	588.235		326.384		557.032		441.708
			Wz 7/89	27	MMG Dresden	541.176		354.765		605.47		480.117
					MMG Dresden	517.647		370.891		632.991		501.941
					MMG Dresden	705.882		271.986		464.193		368.09
					MMG Dresden	588.235		326.384		557.032		441.708
					MMG Dresden	611.765		313.831		535.608		424.719
			Wz 65/89	28	MMG Dresden	588.235		326.384		557.032		441.708
			Wz 67/89	29	MMG Dresden	588.235		326.384		557.032		441.708
					MMG Dresden	541.176		354.765		605.47		480.117
					MMG Dresden	588.235		326.384		557.032		441.708
					MMG Dresden	564.706		339.983		580.242		460.112
					MMG Dresden	611.765		313.831		535.608		424.719
			Wz 75/89	30	MMG Dresden	588.235		326.384		557.032		441.708
					MMG Dresden	611.765		313.831		535.608		424.719
					MMG Dresden	611.765		313.831		535.608		424.719
					MMG Dresden	635.294		302.207		515.771		408.989
					MMG Dresden	588.235		326.384		557.032		441.708
			Esp/Stö 112	31	MMG Dresden	658.824		291.414		497.35		394.382
					MMG Dresden	635.294		302.207		515.771		408.989
			Esp/Stö 113	32	MMG Dresden	658.824		291.414		497.35		394.382
					MMG Dresden	470.588		407.98		696.29		552.135
					MMG Dresden	588.235		326.384		557.032		441.708
			Esp/Stö 114	33	MMG Dresden	564.706		339.983		580.242		460.112
					MMG Dresden	611.765		313.831		535.608		424.719
					MMG Dresden	611.765		313.831		535.608		424.719
					MMG Dresden	635.294		302.207		515.771		408.989
					MMG Dresden	588.235		326.384		557.032		441.708
			Esp/Stö 115	34	MMG Dresden	635.294		302.207		515.771		408.989
					MMG Dresden	588.235		326.384		557.032		441.708
					MMG Dresden	611.765		313.831		535.608		424.719
					MMG Dresden	658.824		291.414		497.35		394.382
					MMG Dresden	635.294		302.207		515.771		408.989
			Esp/Stö 116	35	MMG Dresden	988.235		194.276		331.567		262.921
					MMG Dresden	847.059		226.655		386.828		306.742
					MMG Dresden	776.471		247.26		421.994		334.627
					MMG Dresden	823.529		233.131		397.88		315.506
					MMG Dresden	776.471		247.26		421.994		334.627
			Esp/Stö 117	36	MMG Dresden	588.235		326.384		557.032		441.708
					MMG Dresden	635.294		302.207		515.771		408.989
					MMG Dresden	611.765		313.831		535.608		424.719
					MMG Dresden	658.824		291.414		497.35		394.382
					MMG Dresden	611.765		313.831		535.608		424.719
			Esp/Stö 118	37	MMG Dresden	400		479.976		819.165		649.571
					MMG Dresden	588.235		326.384		557.032		441.708
					MMG Dresden	517.647		370.891		632.991		501.941
					MMG Dresden	564.706		339.983		580.242		460.112
					MMG Dresden	423.529		453.311		773.656		613.483
			Esp/Stö 119	38	MMG Dresden	470.588		407.98		696.29		552.135
					MMG Dresden	447.059		429.452		732.937		581.195
					MMG Dresden	494.118		388.552		663.134		525.843
					MMG Dresden	517.647		370.891		632.991		501.941
					MMG Dresden	447.059		429.452		732.937		581.195
			Esp/Stö 120	39	MMG Dresden	682.353		281.365		480.2		380.783
					MMG Dresden	658.824		291.414		497.35		394.382
					MMG Dresden	682.353		281.365		480.2		380.783
					MMG Dresden	705.882		271.986		464.193		368.09
					MMG Dresden	729.412		263.213		449.22		356.216
			Esp/Stö 121	40	MMG Dresden	494.118		388.552		663.134		525.843
					MMG Dresden	517.647		370.891		632.991		501.941
					MMG Dresden	541.176		354.765		605.47		480.117
					MMG Dresden	494.118		388.552		663.134		525.843
					MMG Dresden	588.235		326.384		557.032		441.708
			Esp/Stö 122	41	MMG Dresden	494.118		388.552		663.134		525.843
					MMG Dresden	658.824		291.414		497.35		394.382
			Esp/Stö 123	42	MMG Dresden	494.118		388.552		663.134		525.843
					MMG Dresden	470.588		407.98		696.29		552.135
					MMG Dresden	588.235		326.384		557.032		441.708
					MMG Dresden	447.059		429.452		732.937		581.195
					MMG Dresden	423.529		453.311		773.656		613.483
			Esp/Stö 124	43	MMG Dresden	564.706		339.983		580.242		460.112
					MMG Dresden	329.412		582.828		994.7		788.764
					MMG Dresden	517.647		370.891		632.991		501.941
					MMG Dresden	400		479.976		819.165		649.571
					MMG Dresden	423.529		453.311		773.656		613.483
			Esp/Stö 125	44	MMG Dresden	541.176		354.765		605.47		480.117
					MMG Dresden	588.235		326.384		557.032		441.708
					MMG Dresden	494.118		388.552		663.134		525.843
					MMG Dresden	517.647		370.891		632.991		501.941
					MMG Dresden	470.588		407.98		696.29		552.135
			Esp/Stö 126	45	MMG Dresden	588.235		326.384		557.032		441.708
					MMG Dresden	376.471		509.975		870.363		690.169
					MMG Dresden	400		479.976		819.165		649.571
					MMG Dresden	470.588		407.98		696.29		552.135
					MMG Dresden	541.176		354.765		605.47		480.117
					Mean	569.016	108.401	351.574	79.1214	600.024	135.035	475.799	107.078
