# Supplementary material for: Fossil plant stomata indicate decreasing atmospheric CO 2 prior to the Eocene–Oligocene boundary
Source: Copernicus journal article supplement (doi:10.5194/cp-12-439-2016), 2016-02-25
Supplement: Supplementary file [file cp-12-439-2016-supplement-title-page.pdf › cp-12-439-2016-supplement-title-page.pdf]

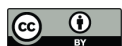

## *Supplement of*

# **Fossil plant stomata indicate decreasing atmospheric CO<sub>2</sub> prior to the Eocene–Oligocene boundary**

**Margret Steinthorsdottir et al.**

*Correspondence to:* Margret Steinthorsdottir ([margret.steinthorsdottir@geo.su.se](mailto:margret.steinthorsdottir@geo.su.se))

- [cp-12-439-2016-supplement-title-page.pdf](#)
- [Supplement1.xlsx](#)

The copyright of individual parts of the supplement might differ from the CC-BY 3.0 licence.
